# Supplementary material for: Cortisol Levels of Shelter Dogs in Animal Assisted Interventions in a Prison: An Exploratory Study
Source: PubMed Central journal article supplement (PMC7911336; doi:10.3390/ani11020345), 2021-01-29
Supplement: animals-11-00345-s001.pdf [file animals-11-00345-s001.pdf]

# Cortisol Levels of Shelter Dogs in Animal Assisted Interventions in a Prison: An Exploratory Study

Danila d'Angelo, Serenella d'Ingeo, Francesca Ciani, Michele Visone, Luigi Sacchettino, Luigi Avallone and Angelo Quaranta\*

\*Correspondence: angelo.quaranta@uniba.it; Tel.: +39-080-544-3927

**Table S1.** Evaluation of Dog's Emotional and Cognitive Disorders (EDED Scale).

| Behavior type              | Specific behavior                                                                                        | Score |
|----------------------------|----------------------------------------------------------------------------------------------------------|-------|
| <b>Centripetal</b>         |                                                                                                          |       |
| Feeding                    | Normal appetite                                                                                          | 1     |
|                            | Hyperphagia (with regurgitation and reingestion) <sup>1</sup>                                            | 3     |
|                            | Anorexia/hyporexia                                                                                       | 4     |
|                            | Dysorexia (moving from hyper to hypo)                                                                    | 5     |
| Drinking                   | Normal drinking                                                                                          | 1     |
|                            | Carries empty water bowl around (ritual) <sup>2</sup>                                                    | 2     |
|                            | Chews at water without swallowing <sup>3</sup>                                                           | 3     |
|                            | High-frequency drinking (documented)                                                                     | 5     |
| Self-stimulatory           | Normal cleaning behavior                                                                                 | 1     |
|                            | Excessive licking, nibbling <sup>4</sup>                                                                 | 4     |
|                            | Stereotyped nibbling, dizziness, turning on itself (or other stereotypies) <sup>5</sup>                  | 5     |
| Sleep                      | Normal (or no change)                                                                                    | 1     |
|                            | Increase in sleep, hypersomnia <sup>6</sup>                                                              | 2     |
|                            | Insomnia, during sleep (and hyposomnia) <sup>7</sup>                                                     | 3     |
|                            | Wakes up shortly after falling asleep, anxiety at time of going to sleep (and restlessness) <sup>8</sup> | 5     |
| <b>Centrifugal</b>         |                                                                                                          |       |
| Exploratory (scanning)     | Normal                                                                                                   | 1     |
|                            | Inhibited                                                                                                | 2     |
|                            | Frequent avoidance responses                                                                             | 3     |
|                            | Increased, hypervigilant                                                                                 | 4     |
|                            | Oral                                                                                                     | 5     |
| Aggression (defense)       | No aggression or aggression stable (no increase or decrease)                                             | 1     |
|                            | Irritation-related aggression                                                                            | 3     |
|                            | Fear-related aggression                                                                                  | 4     |
|                            | Displays both fear and irritation aggression                                                             | 5     |
| Learned social behavior    | Unchanged                                                                                                | 1     |
|                            | No submission response                                                                                   | 2     |
|                            | No self-control when playing                                                                             | 2     |
|                            | Bites without growling                                                                                   | 4     |
|                            | Steals, does not drop stolen objects                                                                     | 5     |
| Specific learned behavior  | Same response capacity (allowing for disease or age)                                                     | 1     |
|                            | Arbitrary responses                                                                                      | 3     |
|                            | No response to previously learned behaviors                                                              | 5     |
| Physical exam <sup>9</sup> | Normal                                                                                                   | 1     |
|                            | Periods of tachycardia and/or tachypnea                                                                  | 2     |
|                            | Diarrhea, colic                                                                                          | 2     |
|                            | Dyspepsia (and ptyalism)                                                                                 | 2     |
|                            | Increased emotional micturition                                                                          | 3     |
|                            | Acral lick granuloma (and extensive lick alopecia)                                                       | 4     |

**Table S2.** Score values referred to EDED Scale.

| <b>E.S.E.D. value</b> | <b>Interpretation</b>        |
|-----------------------|------------------------------|
| 9-12                  | Normal state                 |
| 13-16                 | Phobias                      |
| 17-35                 | Anxieties                    |
| 36-44                 | Emotional (Thymic) disorders |
